# Supplementary material
Source: publisher figshare collection journal article supplement (https://karger.figshare.com/ndownloader/files/40882487)
Supplement: Supplementary file 1 [file 40882487]

**sTable 2 Univariable and multivariable analysis of risk factors for complications in spleen preservation group (ITT analysis)**

|  | n | No. with complications | Univariable analysis | |  | Multivariable analysis | |
| --- | --- | --- | --- | --- | --- | --- | --- |
|  | Relative risk | P |  | Relative risk | P |
| Depth of tumor invasion |  |  |  |  |  |  |  |
| T2 | 141 | 23 | 1 |  |  | 1 |  |
| T3, T4 | 110 | 19 | 1.059 (0.608 - 1.843) | 0.8396 |  | 1.047 (0.540 - 2.030) | 0.8918 |
| Lymph node metastasis |  |  |  |  |  |  |  |
| N0 | 106 | 13 | 1 |  |  | 1 |  |
| N1, N2 | 145 | 29 | 1.631 (0.891 - 2.984) | 0.1127 |  | 1.467 (0.721 - 2.984) | 0.2898 |
| Sex |  |  |  |  |  |  |  |
| M | 204 | 34 | 1 |  |  | 1 |  |
| F | 47 | 8 | 1.021(0.506 - 2.060) | 0.9531 |  | 1.466 (0.652 - 3.299) | 0.3551 |
| Age (years) |  |  |  |  |  |  |  |
| <65 | 115 | 15 | 1 |  |  | 1 |  |
| ≥65 | 136 | 27 | 1.522 (0.852 - 2.719) | 0.1560 |  | 1.508 (0.793 - 2.866) | 0.2099 |
| Body mass index |  |  |  |  |  |  |  |
| <25 | 185 | 22 | 1 |  |  | 1 |  |
| ≥25 | 66 | 20 | 2.548 (1.490 - 4.357) | 0.0006 |  | 2.226 (1.191 - 4.160) | 0.0122 |
| Operating time (min) |  |  |  |  |  |  |  |
| <229 | 133 | 17 | 1 |  |  | 1 |  |
| ≥229 | 118 | 25 | 1.658 (0.943 - 2.914) | 0.0791 |  | 1.190 (0.609 - 2.326) | 0.6113 |
| Blood loss (ml) |  |  |  |  |  |  |  |
| <350 | 136 | 15 | 1 |  |  | 1 |  |
| ≥350 | 115 | 27 | 2.129 (1.192 - 3.803) | 0.0107 |  | 1.827 (0.910 - 3.668) | 0.0901 |
